# Supplementary figures and images for: The Role of Oxytocin in the Dog–Owner Relationship
Source: MDPI journal article supplement (doi:10.3390/ani9100792), 2019-10-12

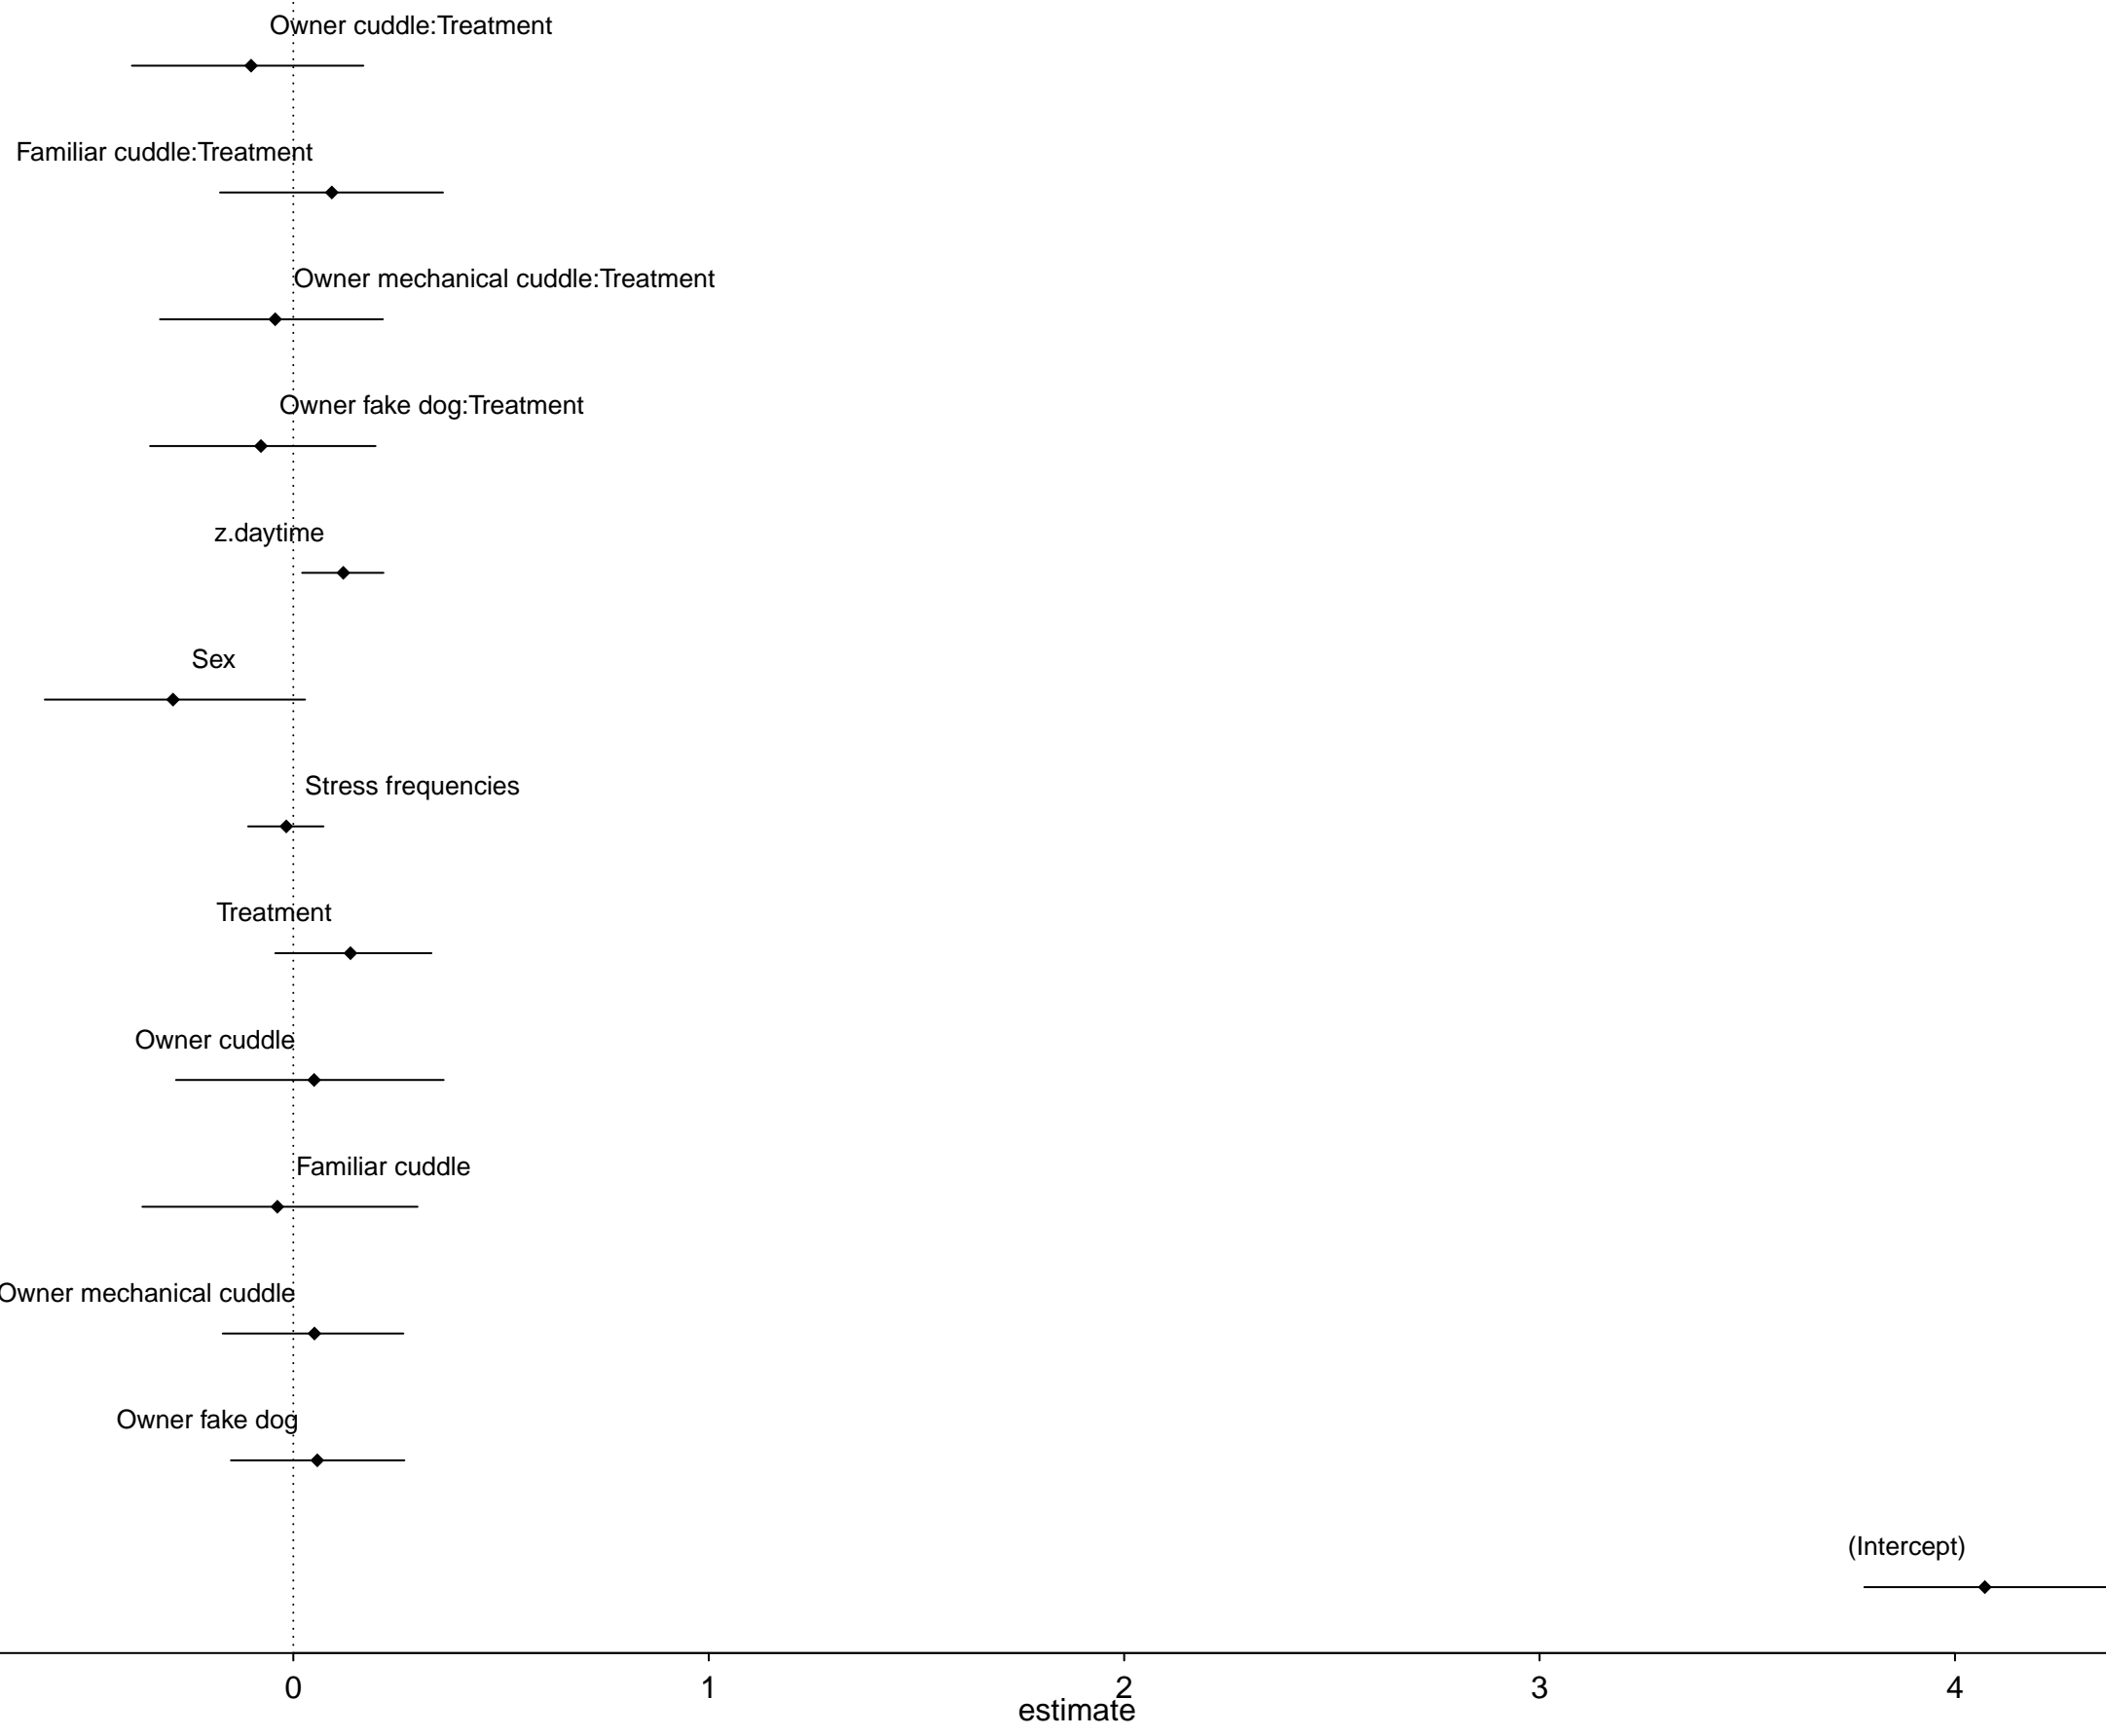

Supplement: s1 [file s1]

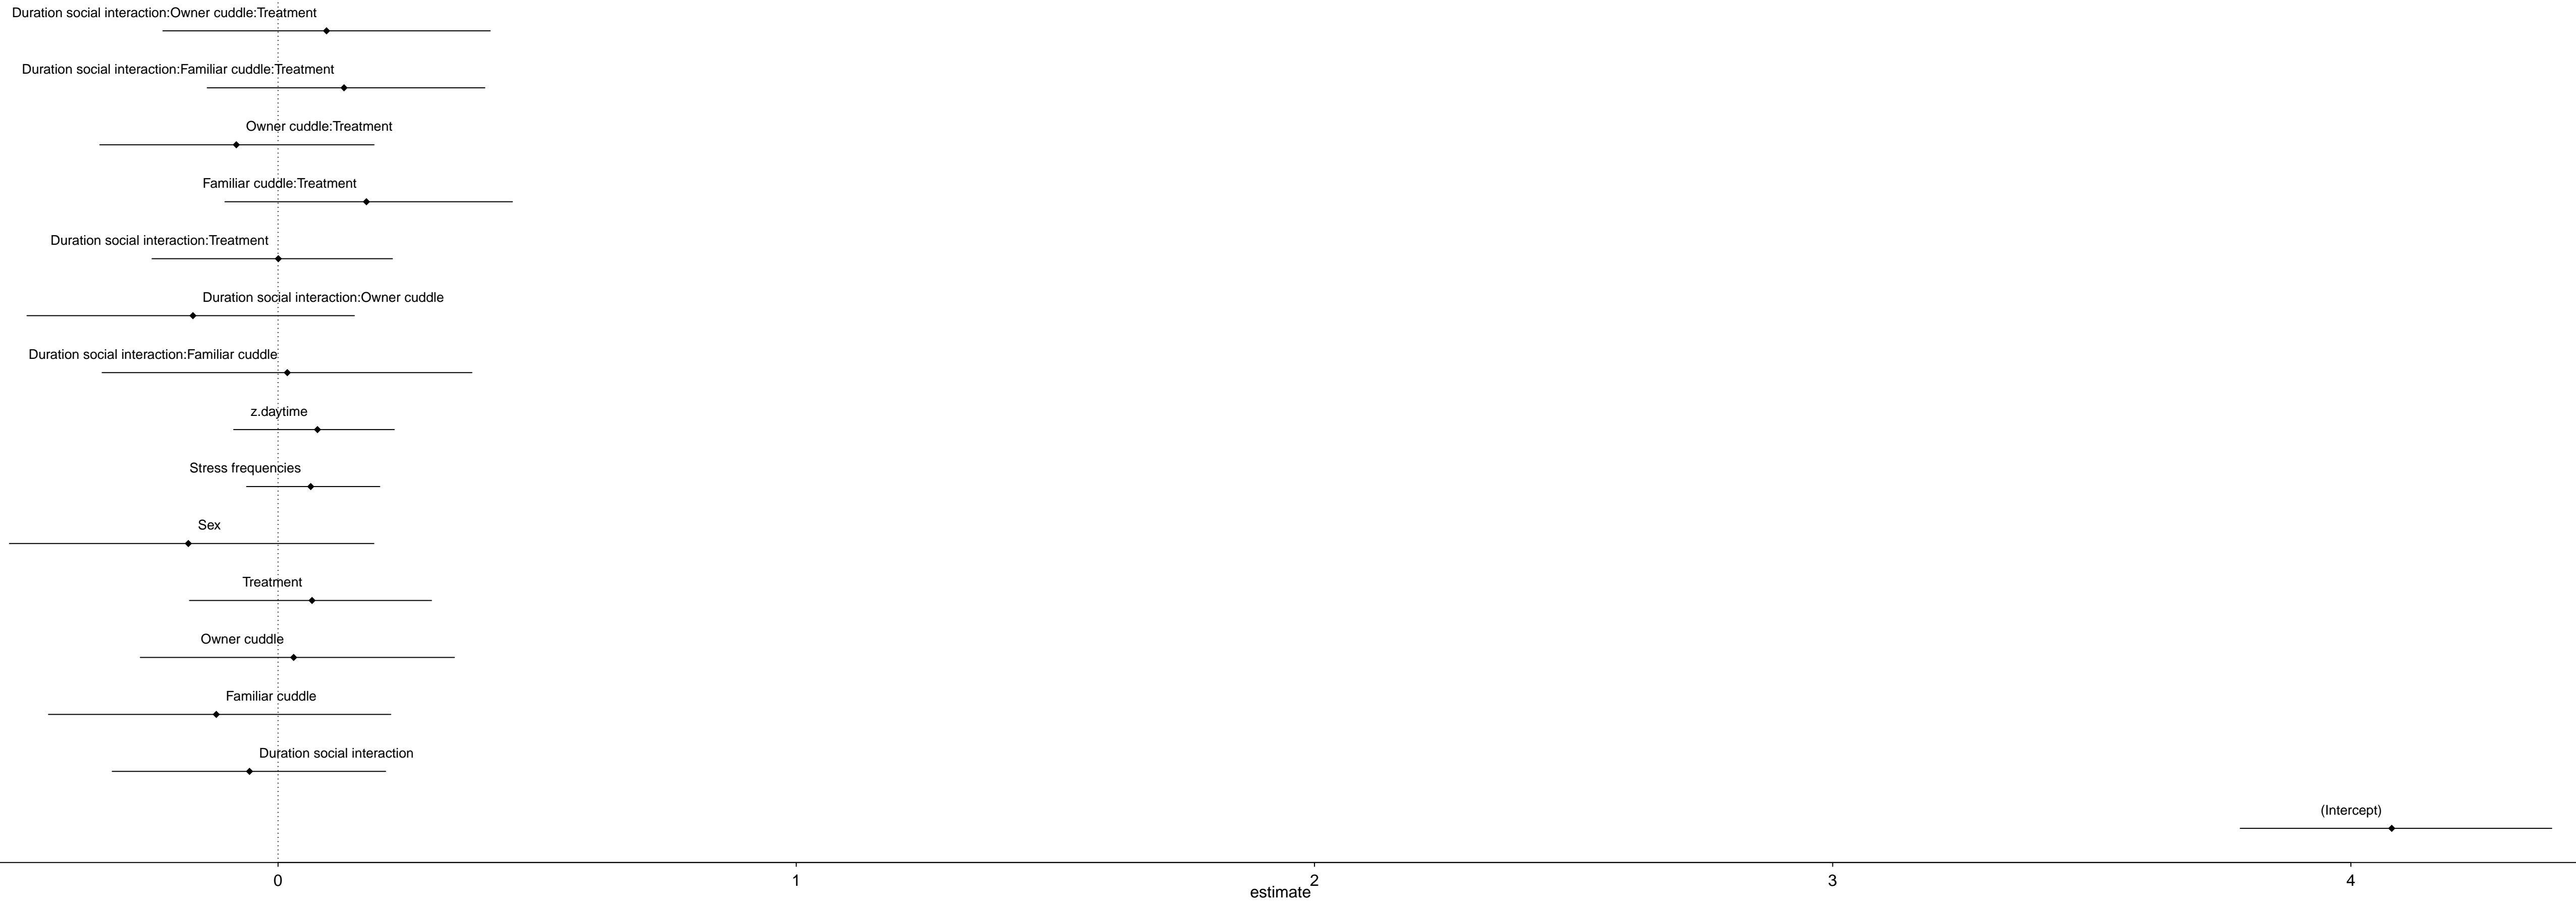

Supplement: s1 [file s1]

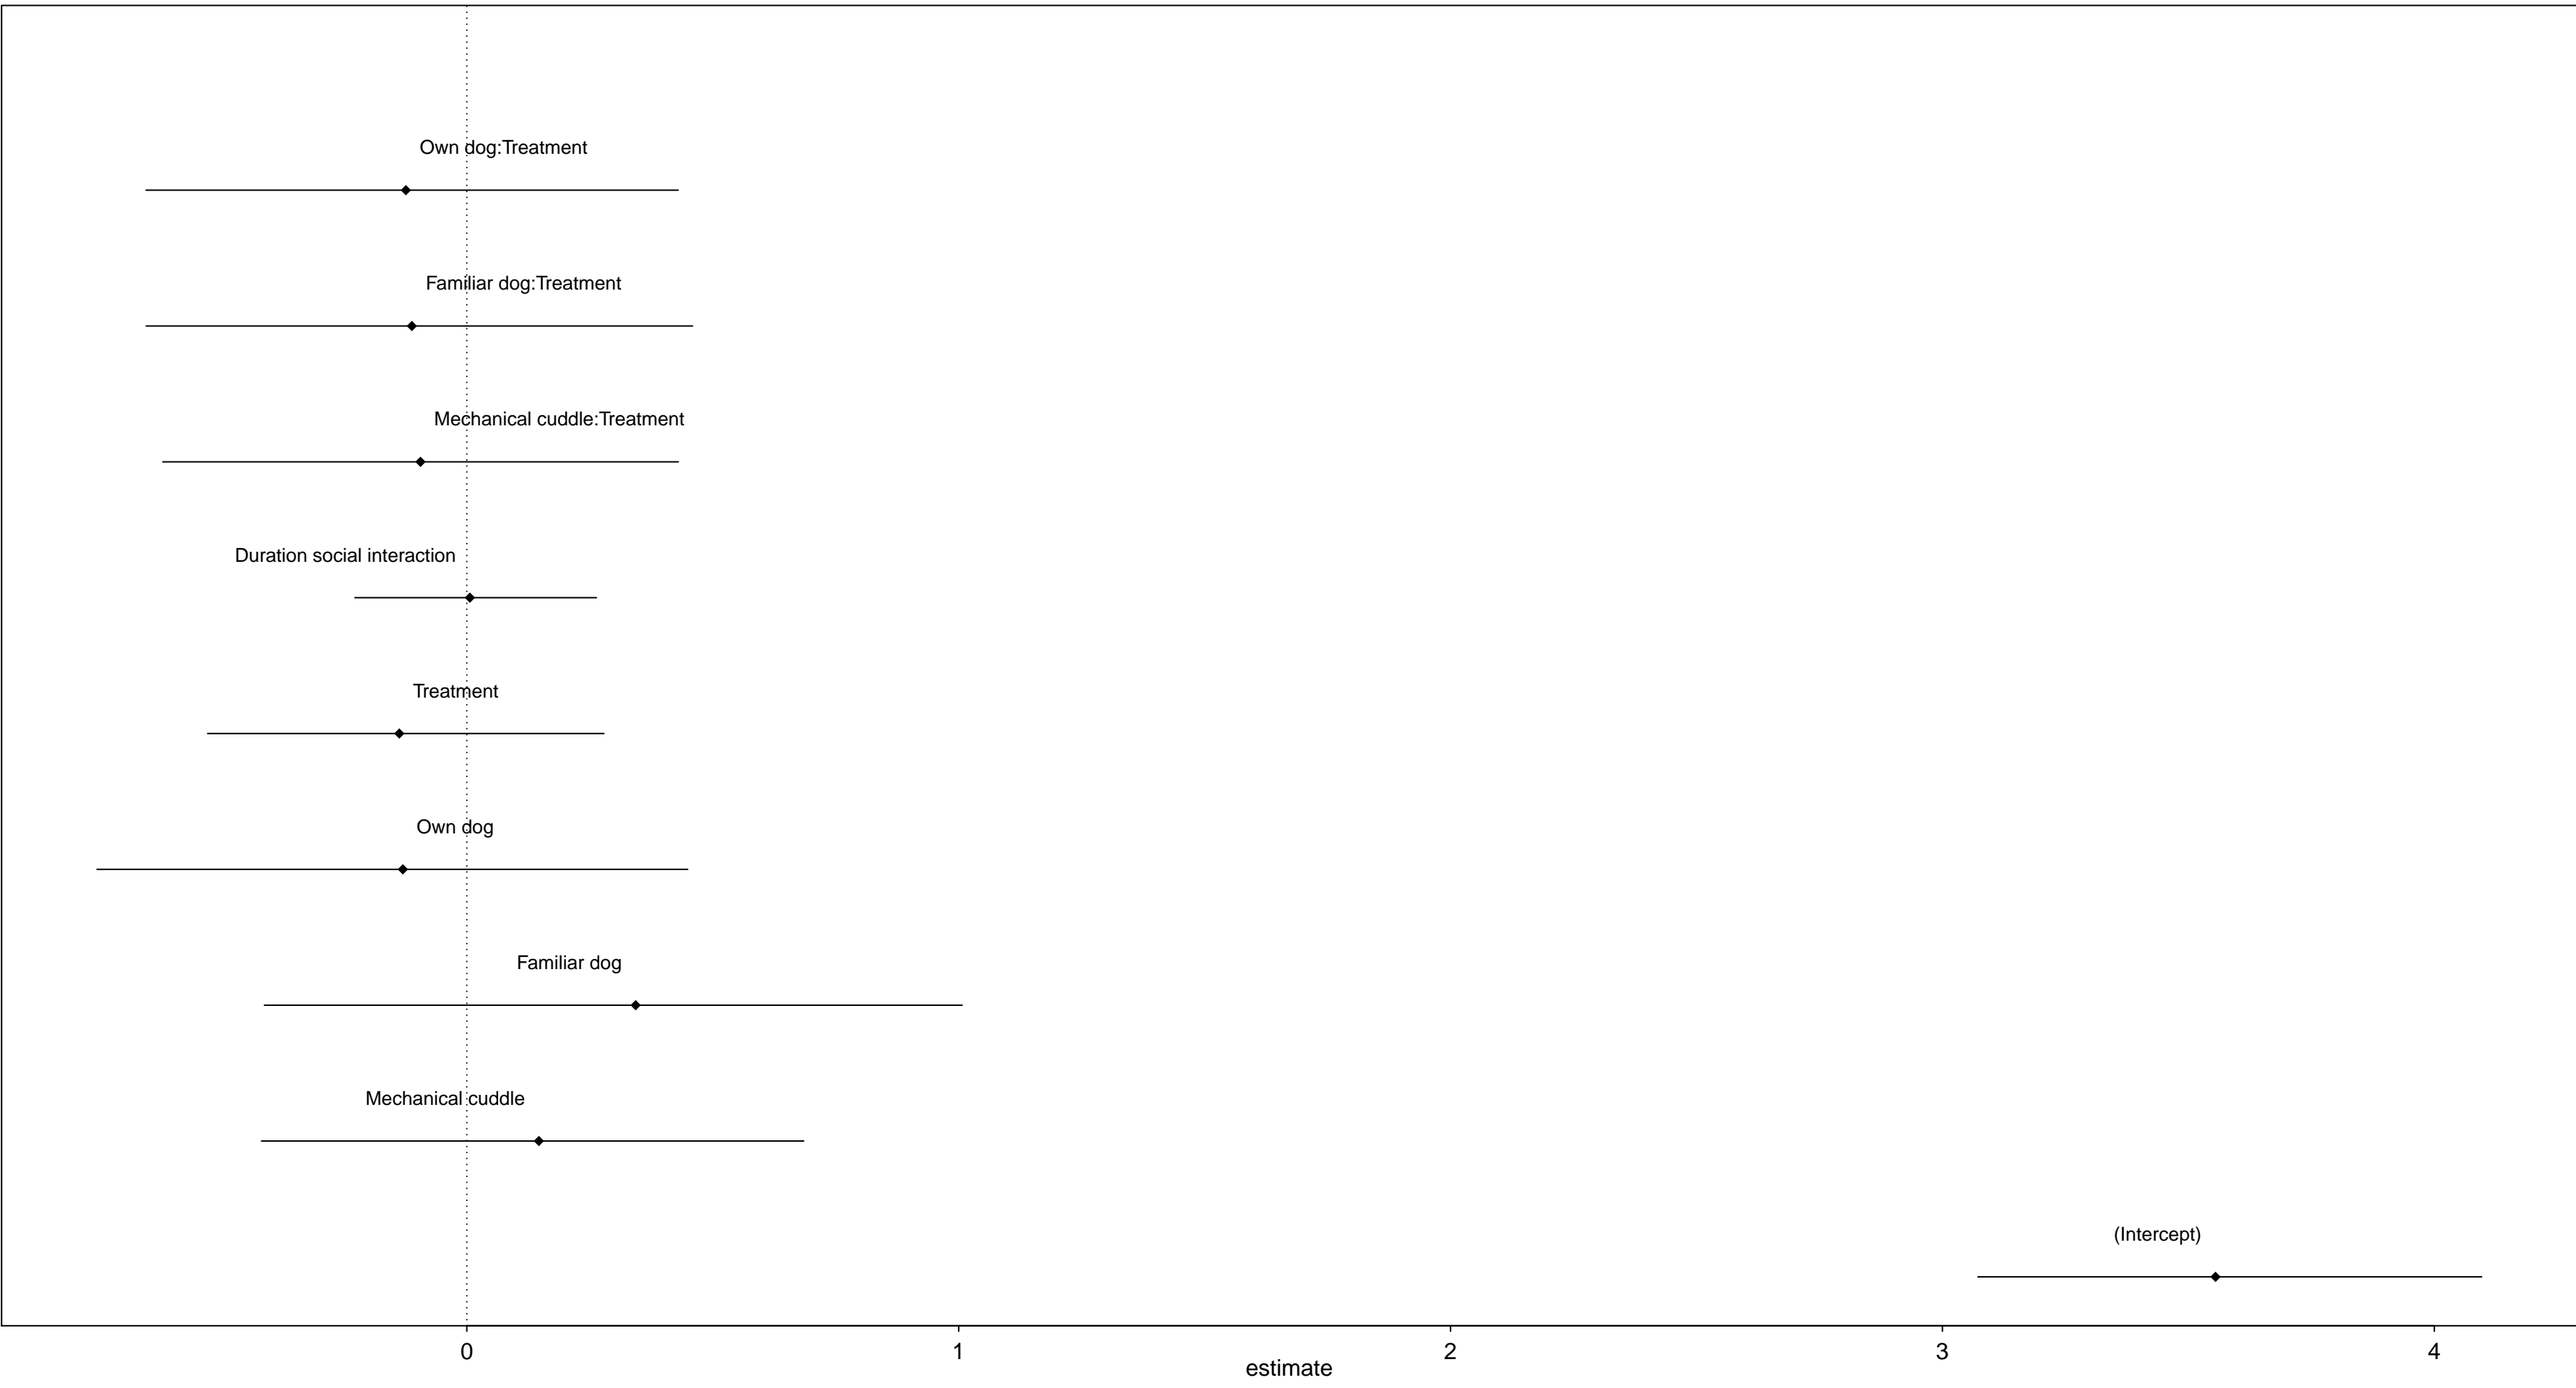

Supplement: s1 [file s1]
